# Supplementary material for: The role of the globus pallidus subregions in the schizophrenia spectrum continuum
Source: Research Square preprint supplement (doi:10.21203/rs.3.rs-6439243/v1), 2025-06-05
Supplement: Supplementary file 1 [file 264d633713ceb0519e9d5054.xlsx]

## Sheet: Sheet1
Table 1. Basic demographic data of subjects.
a. Schizophrenia Cohort Study (Study 1) - sMRI
	HC (N = 63)		SZ (N = 45)		t/χ2 value	p value
	N/Mean	SD	N/Mean	SD
Age	38.1	7.9	29.6	9.6	5	3.0 × 10−6
Sex (Male/Female)	24/39		25/20		3.2	0.072
BPRS a)			22.6	10.3
Affect b)			5	2.7
Positive symptoms b)			5.6	3.3
Negative symptoms b)			5.9	3.5
Resistance a)			3.3	2.1
Activation b)			3	2
CP equivalent (mg/d)			559.1	436.5
b. Schizophrenia Cohort Study (Study 1) - rsfMRI
	HC (N = 60)		SZ (N = 44)		t/χ2 value	p value
	N/Mean	SD	N/Mean	SD
Age	38.3	7.8	29.7	9.8	4.8	7.0 × 10−6
Sex (Male/Female)	24/36		24/20		2.2	0.14
BPRS a)			40.5	10.4
Affect b)			9.1	2.6
Positive symptoms b)			9.7	3.3
Negative symptoms b)			8.8	3.4
Resistance a)			6.2	2.1
Activation b)			6	2
CP equivalent (mg/d)			562.708	440.899
c. Adolescent Cohort Study (Study 2) - sMRI
	SPE-N (N = 139)		SPE-P (N = 65)		t/χ2 value	p value
	N/Mean	SD	N/Mean	SD
Age	11.5	0.7	11.6	0.8	-0.6	0.54
Sex (Male/Female)	72/67		34/31		0	0.95
SDQ TD	7.5	4.4	8.7	4.6	-1.8	0.07
d. Adolescent Cohort Study (Study 2) - rsfMRI
	SPE-N (N = 145)		SPE-P (N = 66)		t/χ2 value	p value
	N/Mean	SD	N/Mean	SD
Age	11.6	0.7	11.6	0.7	-0.3	0.74
Sex (Male/Female)	77/68		36/30		0	0.85
SDQ TD	7.5	4.7	9	4.7	-2.1	0.033
a) Two patients with missing data
b) One patient with missing data
Abbreviations: sMRI, structural magnetic resonance imaging; HC, healthy controls; SZ, schizophrenia; SD, standard deviation; BPRS, Brief Psychiatric Rating Scale; CP, chlorpromazine; rsfMRI, resting-state functional magnetic resonance imaging; SPE, subclinical psychotic experience; SPE-N, SPE-negative; SPE-P, SPE-positive; SDQ TD, Strengths and Difficulties Total Difficulties.
