# Supplementary material for: The role of the globus pallidus subregions in the schizophrenia spectrum continuum
Source: Research Square preprint supplement (doi:10.21203/rs.3.rs-6439243/v1), 2025-06-05

**Supplementary Information**

**The role of the globus pallidus subregions in the schizophrenia spectrum continuum**

**Supplementary Fig. S1:** Associations between the volumes of the left and right globus pallidus externus (GPe) and internus (GPi) and the subscales of the Brief Psychiatric Rating Scale (BPRS). Adjusted GPe/GPi volumes (the vertical axis) were calculated as residuals after regressing out the effects of age, sex, and intracranial volume in patients with schizophrenia (N = 45) for visual purposes.


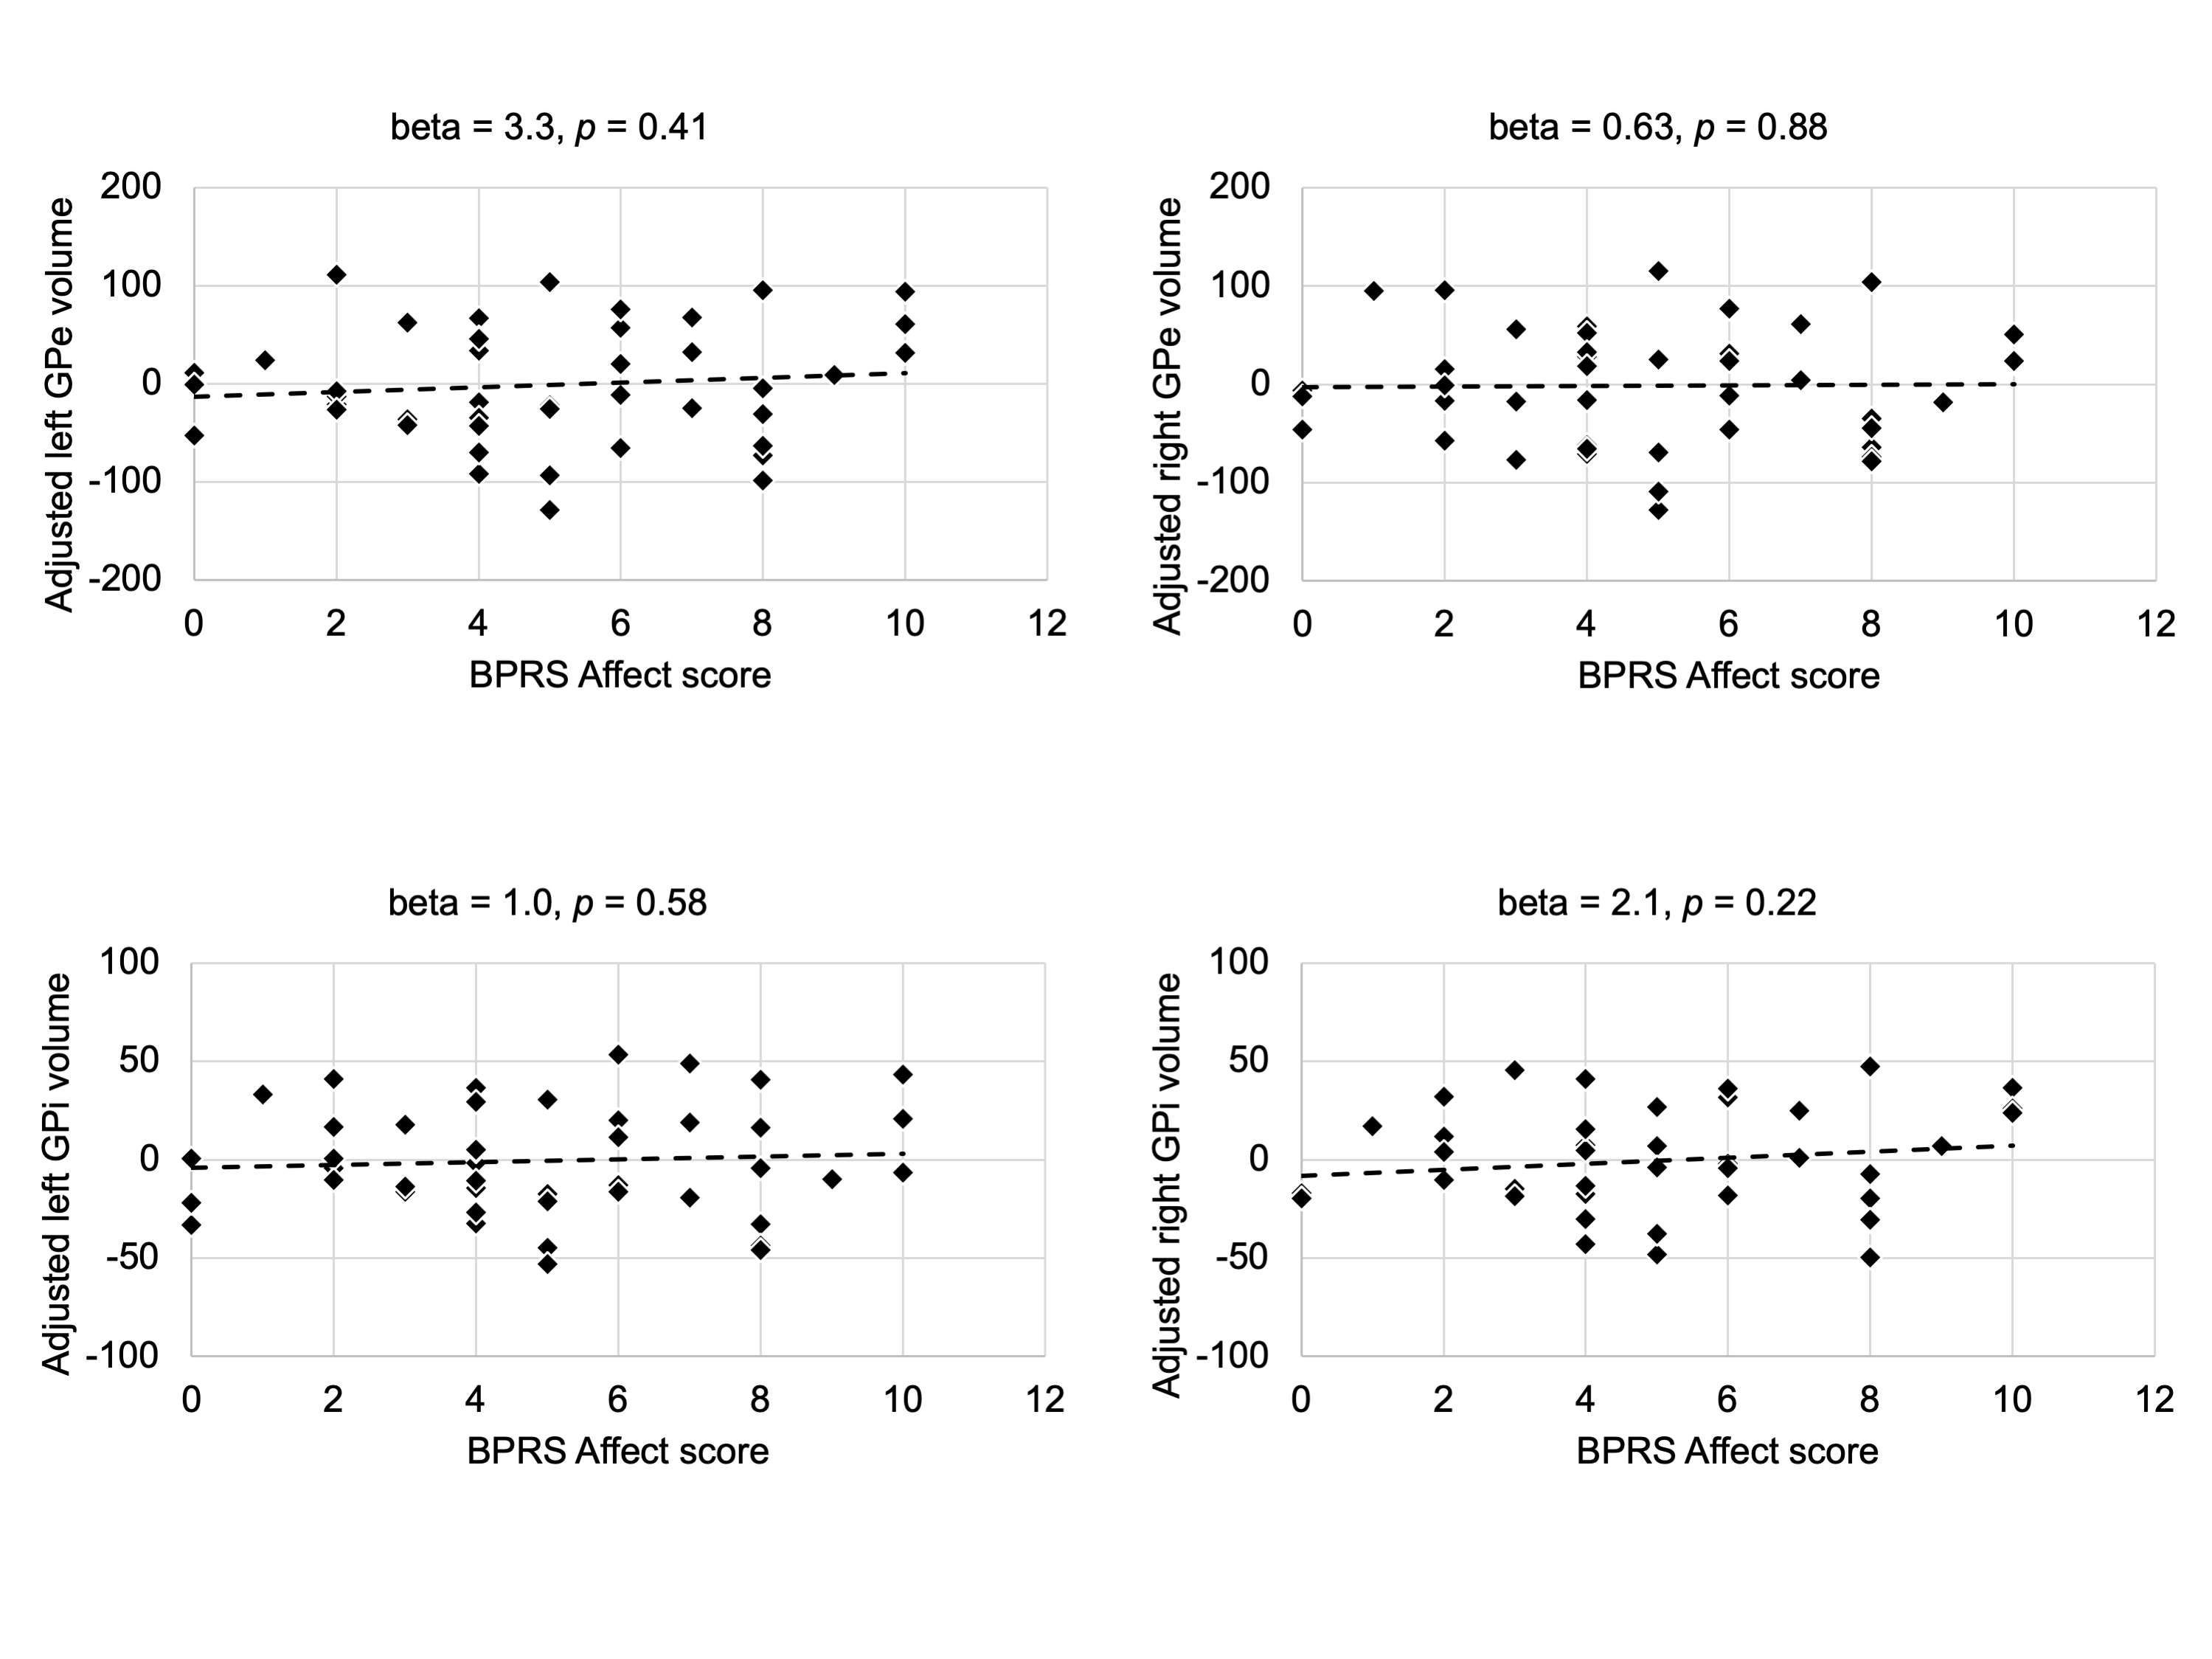


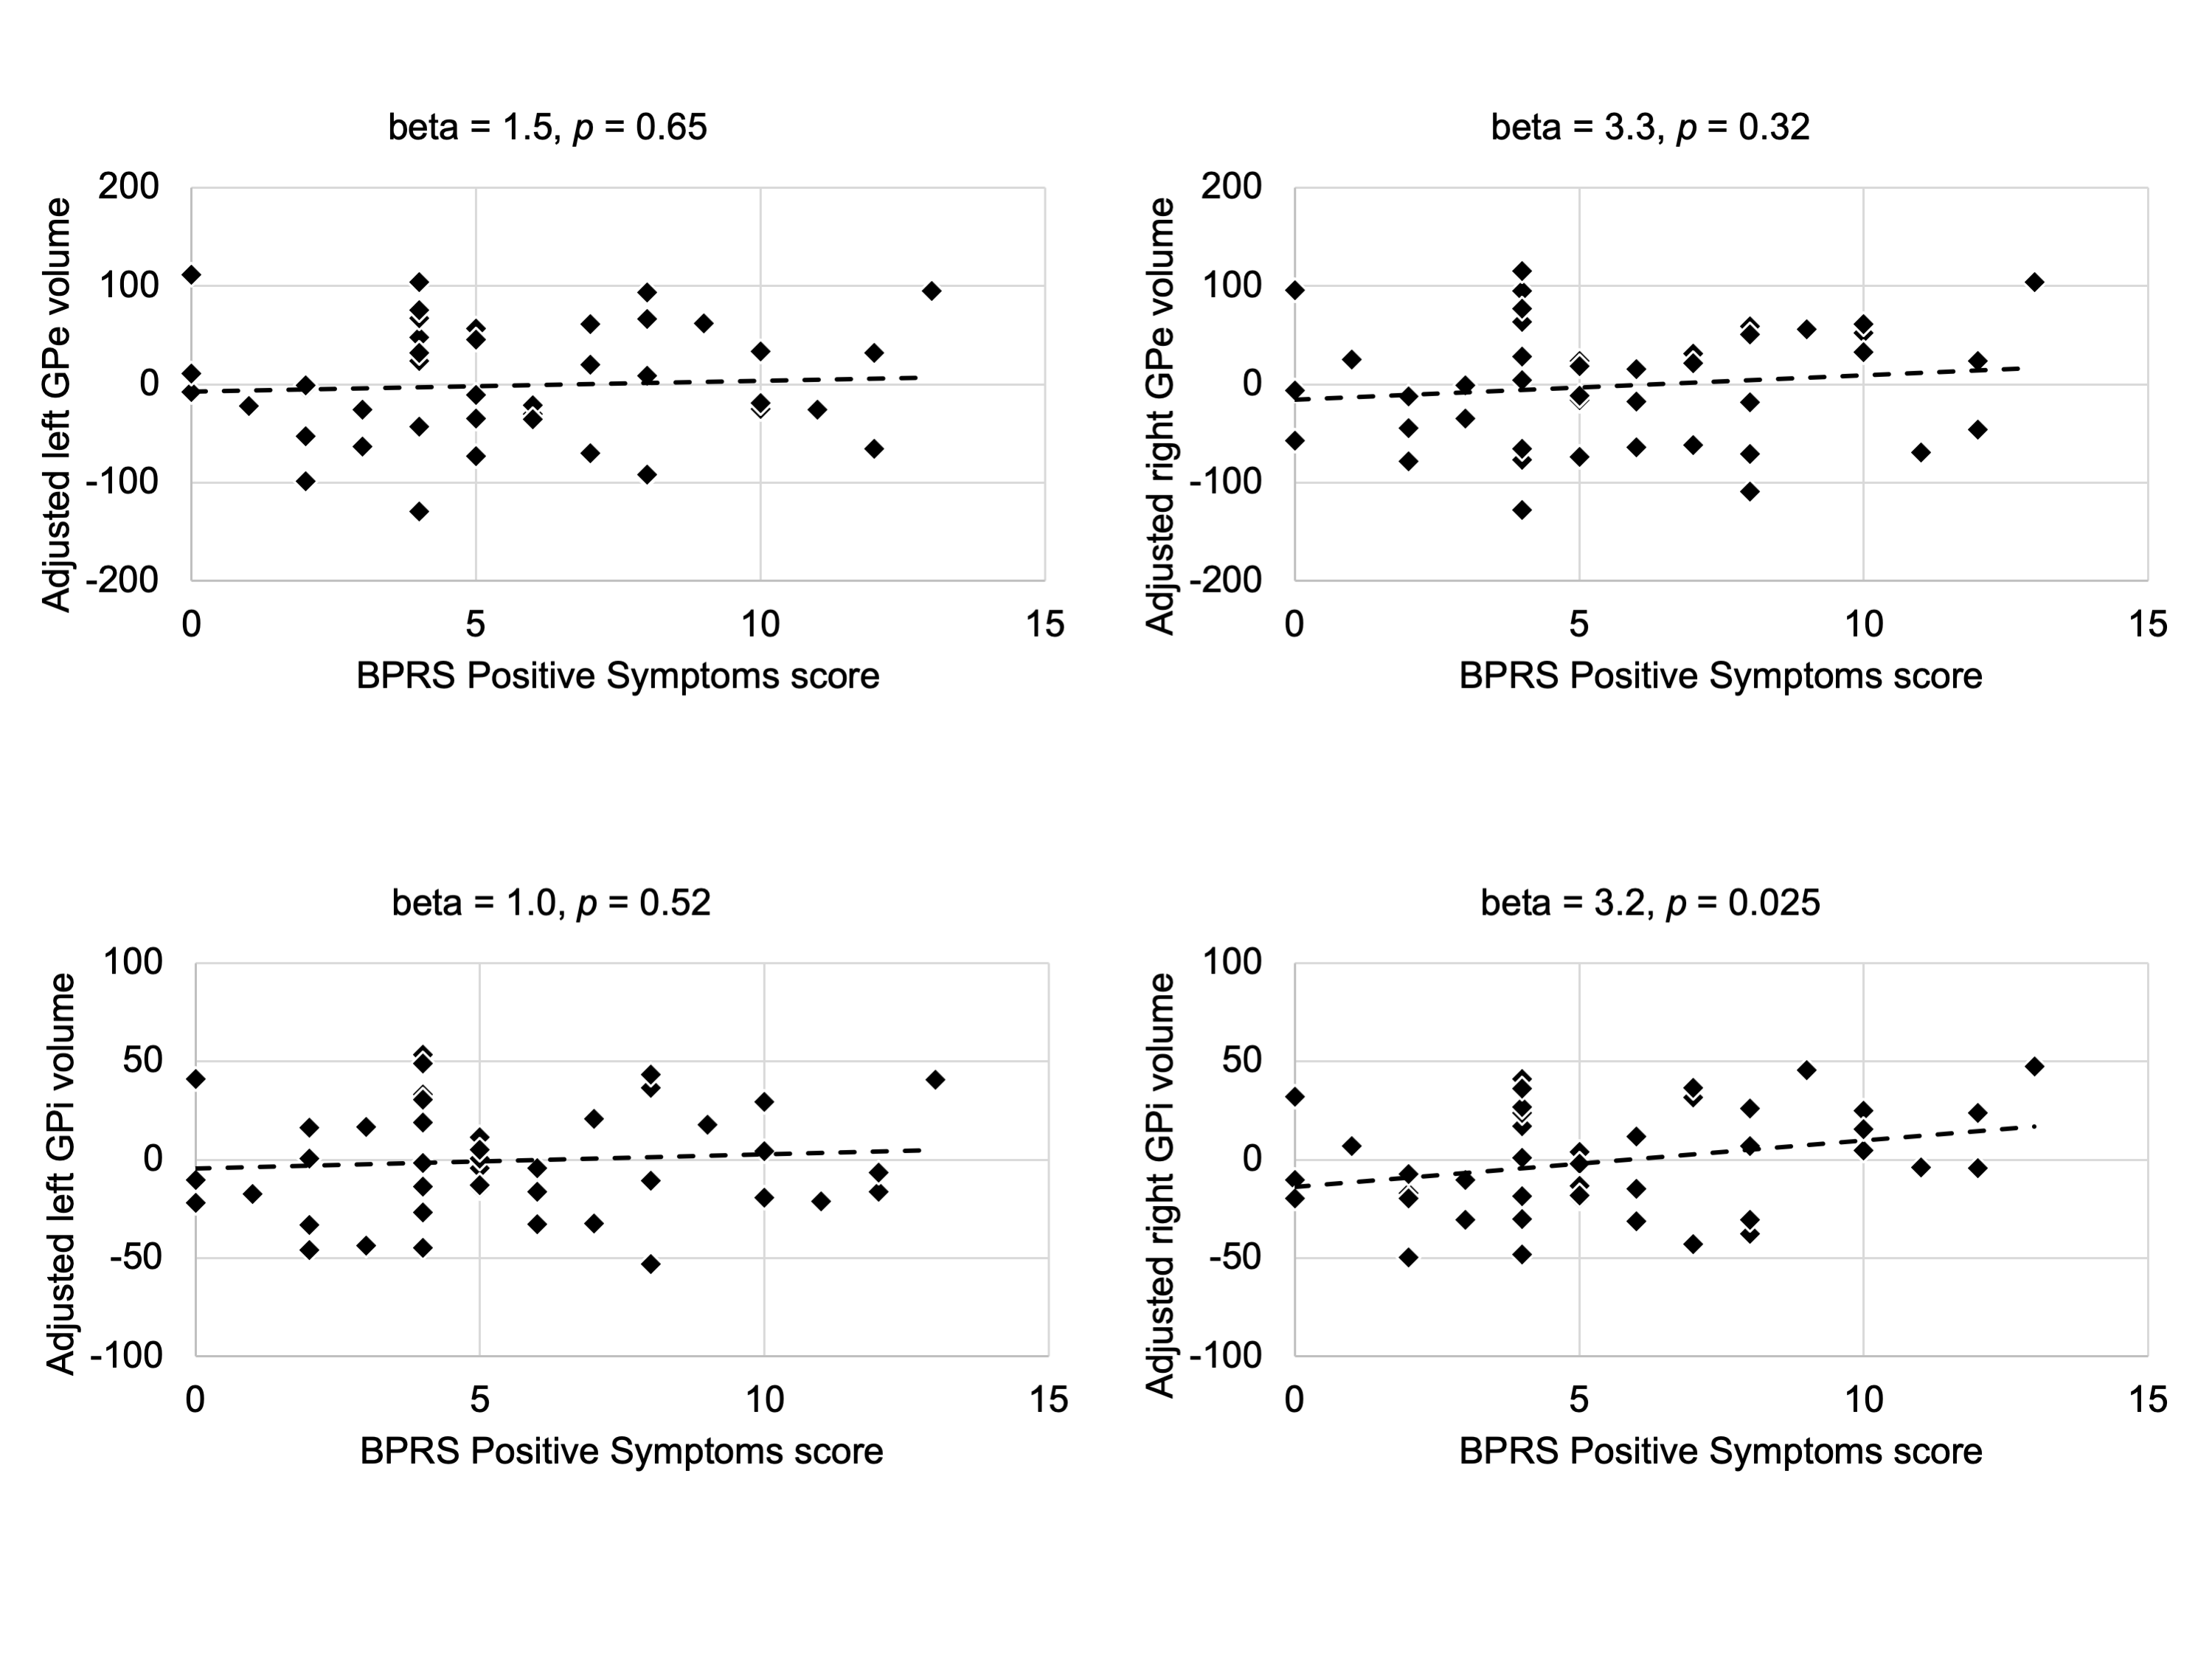


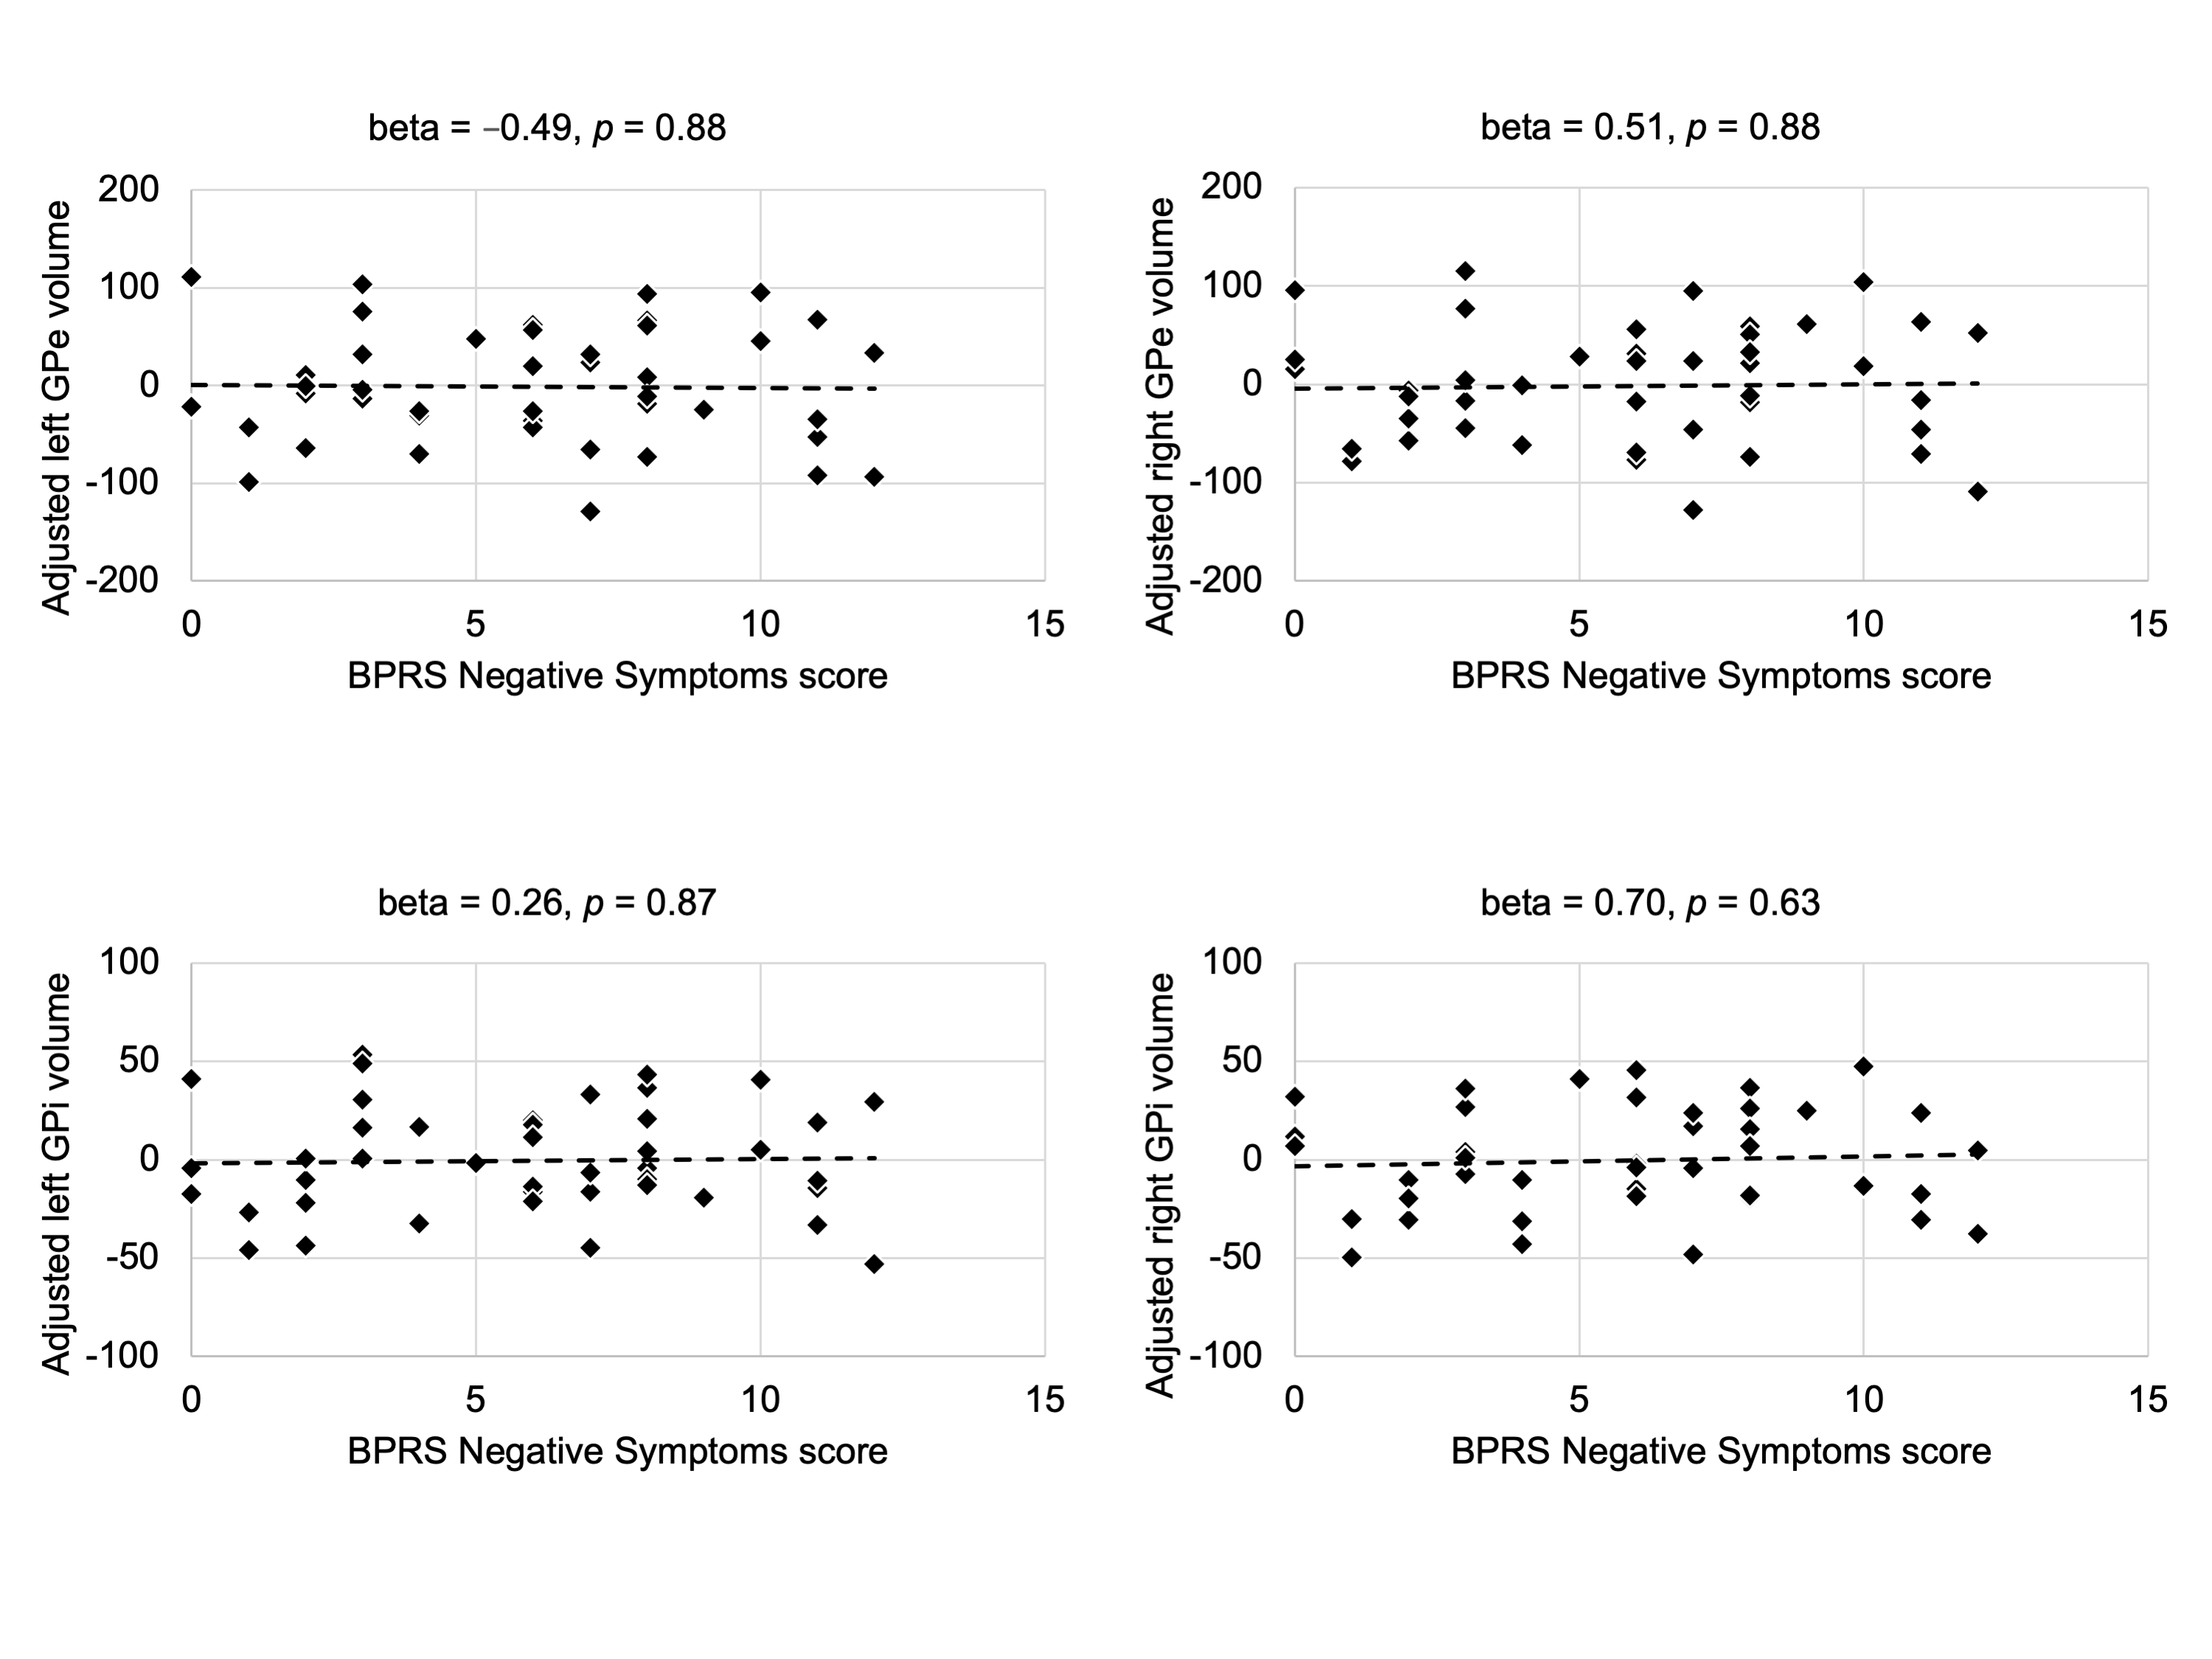


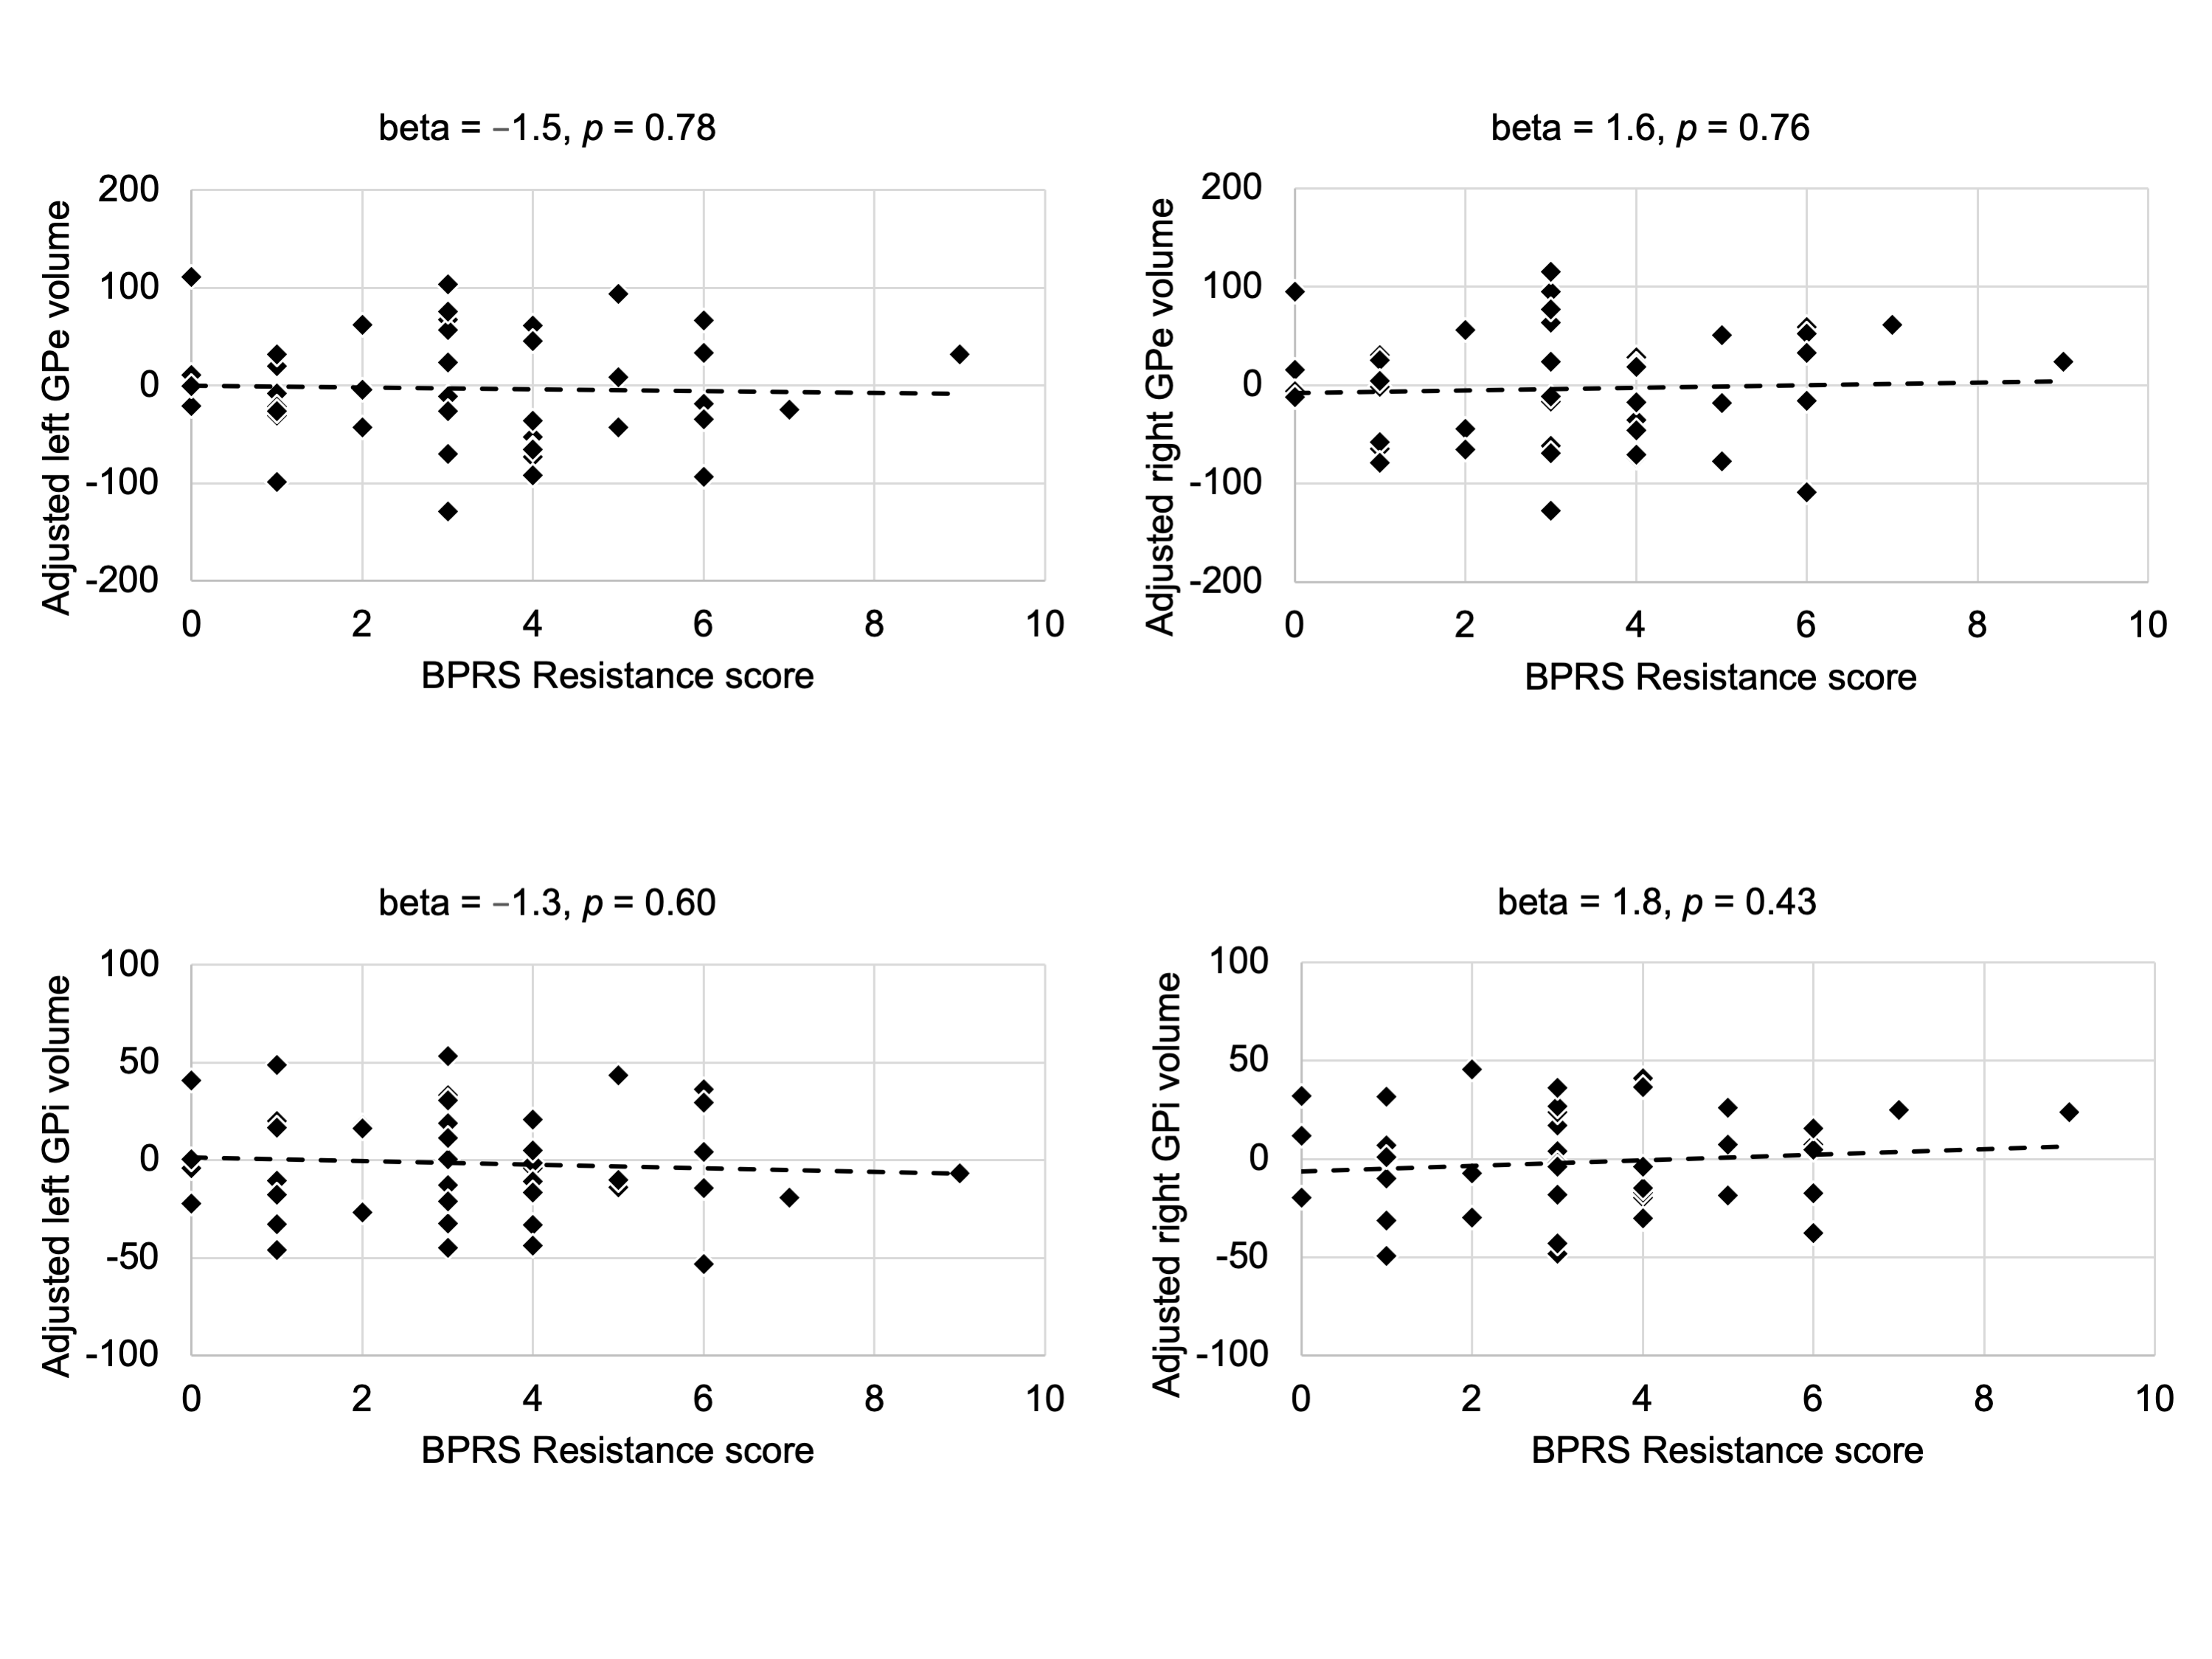


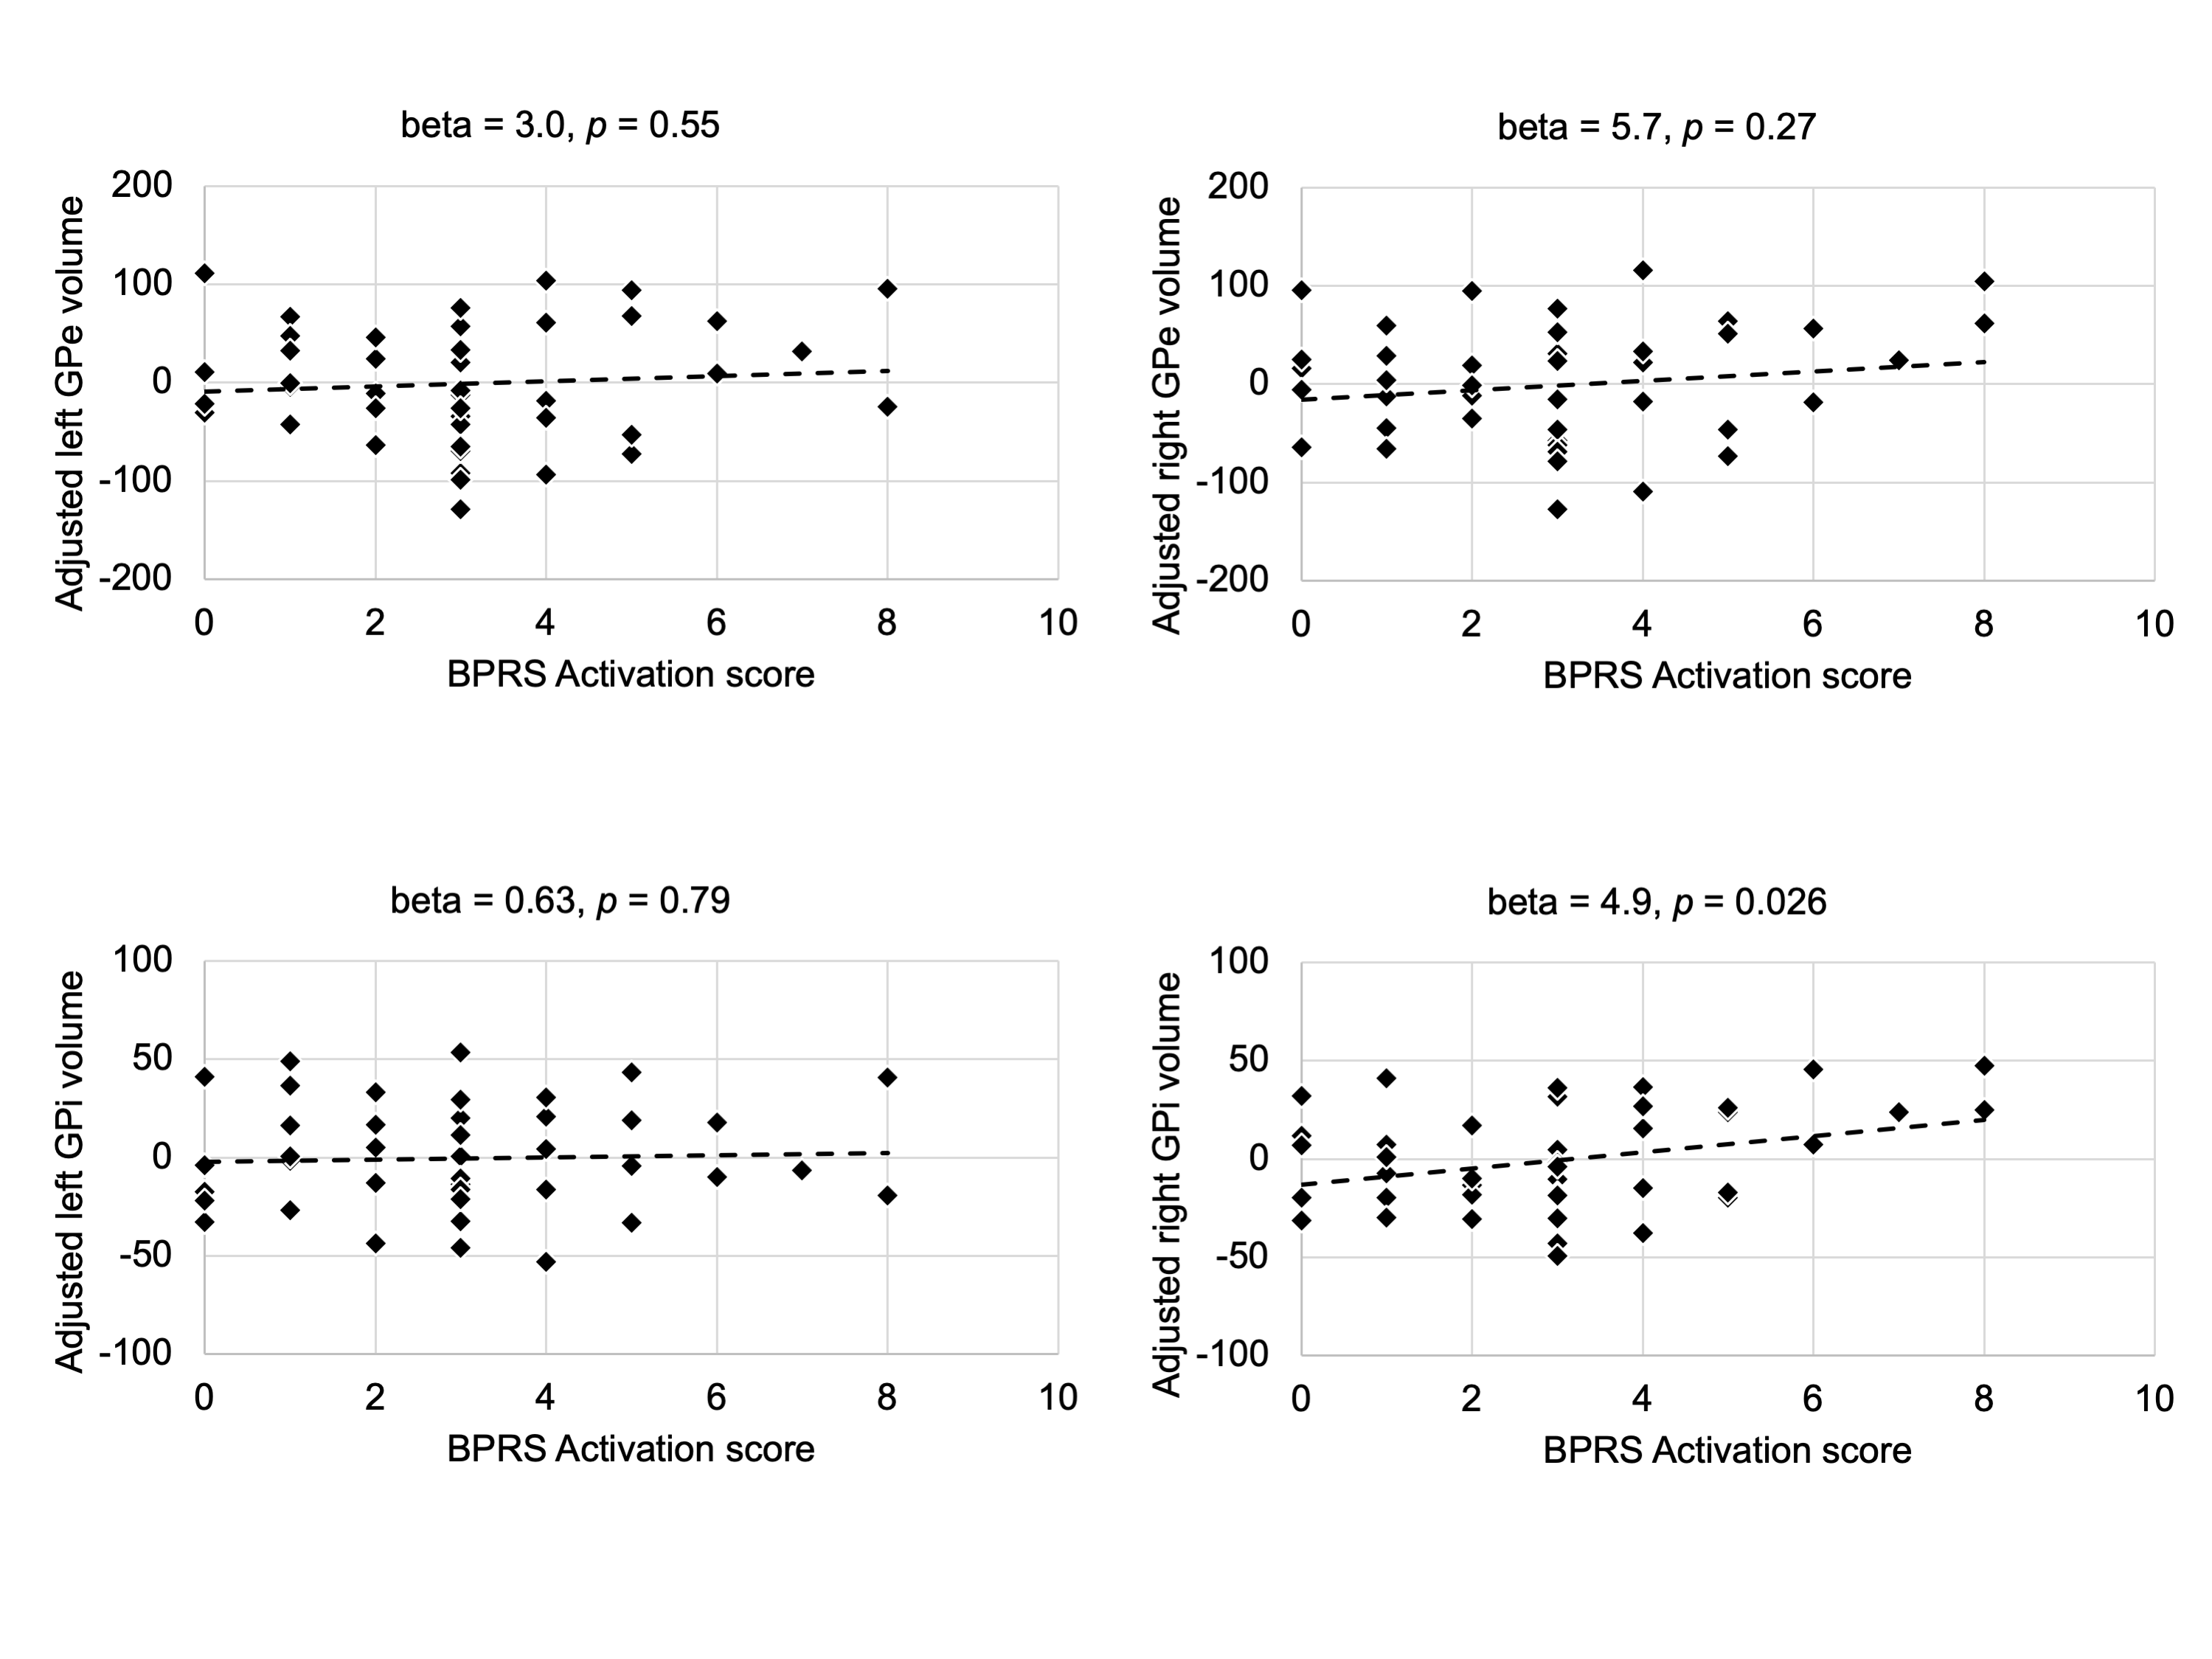


**Supplementary Fig. S2:** Associations between the functional connectivity of the left and right globus pallidus externus (GPe) and internus (GPi) and the subscales of the Brief Psychiatric Rating Scale (BPRS).


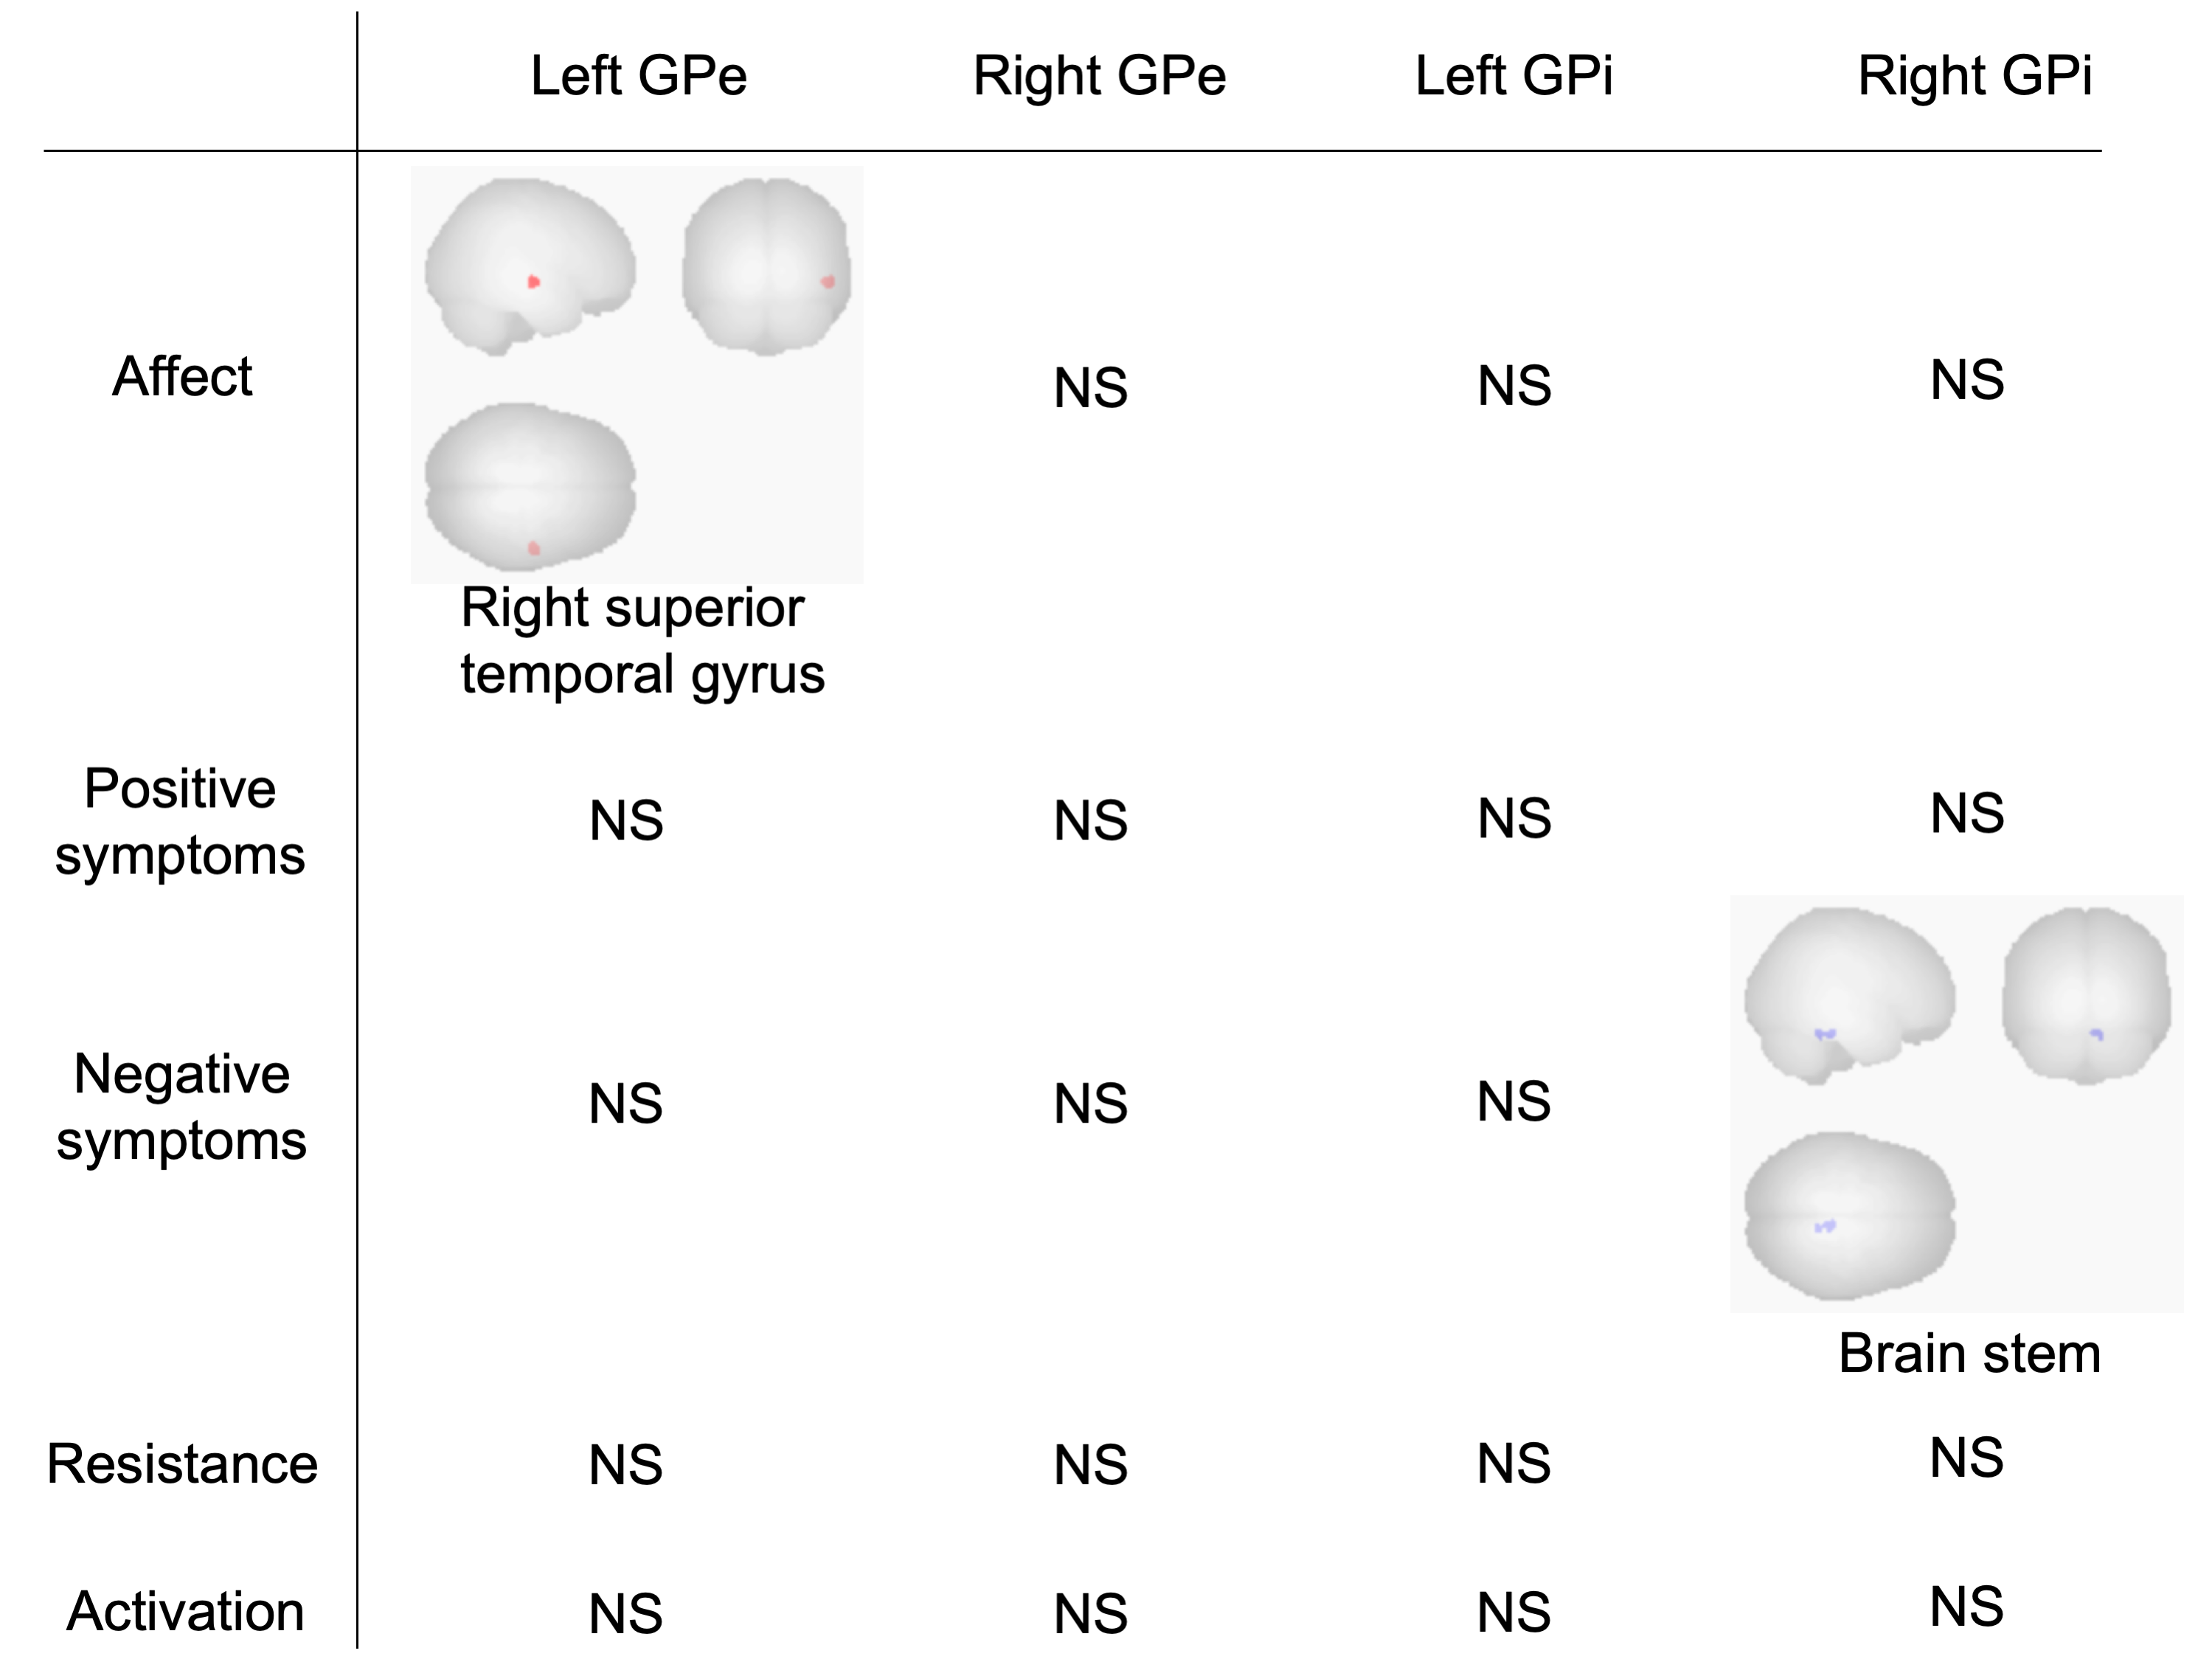

Supplement: Supplementary file 2 [file af9351ae59eacf8d29bdfe2b.docx]
